# Supplementary material for: Heterogeneous reaction of acetic acid on MgO, α-Al2O3, and CaCO3 and the effect on the hygroscopic behaviour of these particles
Source: Royal Society of Chemistry journal article supplement (doi:10.1039/c2cp40510e), 2012-01-01
Supplement: c2cp40510e.pdf [file c2cp40510e.pdf]

## Supporting information

### for Heterogeneous Reaction of Acetic Acid on MgO, $\alpha$ -Al<sub>2</sub>O<sub>3</sub>, and CaCO<sub>3</sub> and the Effect on the Hygroscopic Behaviour of these Particles

Qingxin Ma, Yongchun Liu, Chang Liu, Hong He\*

\*Research Center for Eco-Environmental Science, Chinese Academy of Sciences,  
Beijing 100085, China

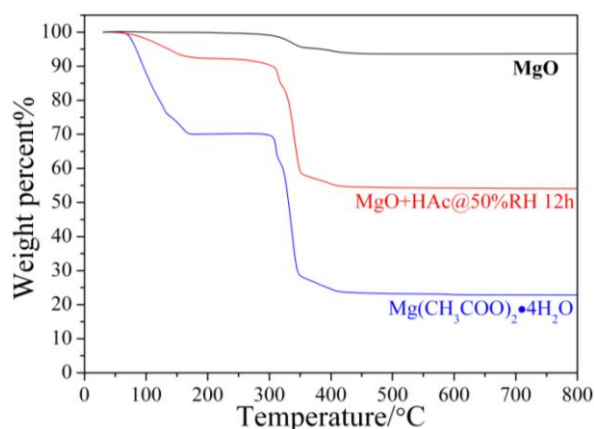

Fig. S1 TGA curves of MgO (black), MgO reacted with HAc at 50%RH for 12h (red), and Mg(CH<sub>3</sub>COO)<sub>2</sub>·4H<sub>2</sub>O particles (blue). The thermogravimetric analysis (TGA) thermograms were obtained from a METTLER-TOLDO (TGA/DSC 1/1600) thermal gravimetry with an accuracy of  $\pm 1\mu\text{g}$ . The balance and sample compartments were purged with nitrogen. The temperature program was from 30 to 800 °C, with an increasing rate of 10 °C min<sup>-1</sup> in a flow of 50 mL/min N<sub>2</sub>.

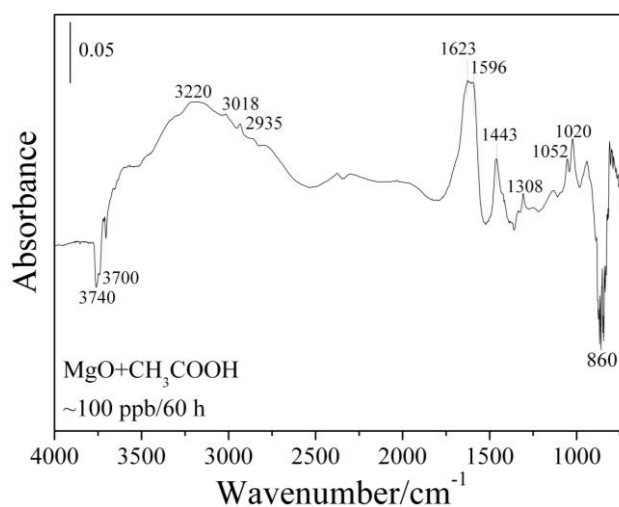

Fig. S2 IR spectrum of MgO exposed to CH<sub>3</sub>COOH with concentration of ~100 ppb at 50%RH for 60 h at 300 K.
